# Supplementary material for: Nonmonotonic strain dependence of lattice thermal conductivity in monolayer SiC: a first-principles study
Source: Royal Society of Chemistry journal article supplement (doi:10.1039/c8cp02006j), 2018-01-01
Supplement: c8cp02006j1.pdf [file c8cp02006j1.pdf]

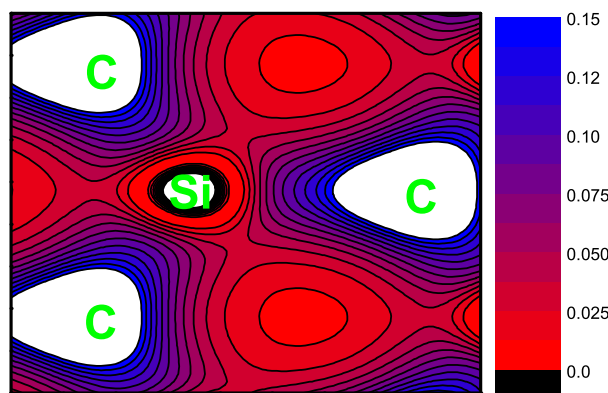

FIG. 1. (Color online) The charge density distributions of monolayer SiC (unit:  $|e|/\text{bohr}^3$ ).

TABLE I. Born effective charges  $Z^*$  of Si and C atoms and the dielectric constants ( $\epsilon$ ) of monolayer SiC. They along other directions are zero except  $xx$ ,  $yy$  and  $zz$  directions.

| Direction | $Z^*(\text{C})$ | $Z^*(\text{Si})$ | $\epsilon$ |
|-----------|-----------------|------------------|------------|
| $xx$      | -3.674          | 3.674            | 2.531      |
| $yy$      | -3.674          | 3.674            | 2.531      |
| $zz$      | -0.271          | 0.271            | 1.180      |

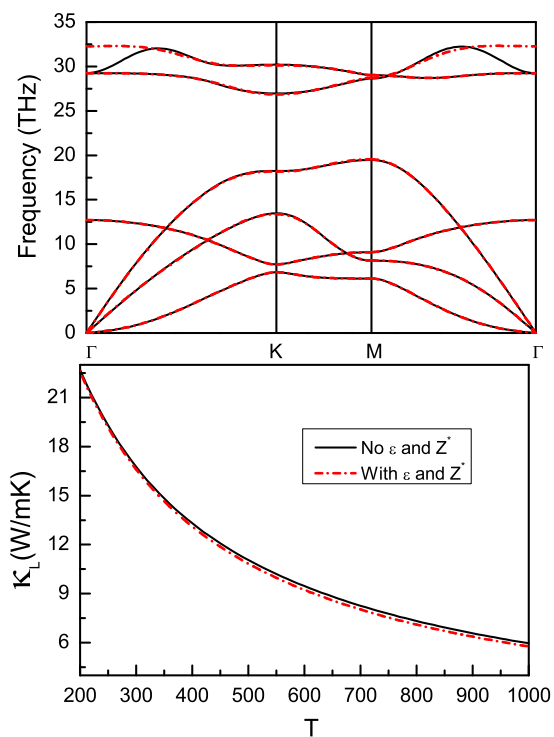

FIG. 2. (Color online) The phonon band structures (Top) and lattice thermal conductivity (Bottom) of monolayer SiC with or without the dielectric constants  $\epsilon$  and Born effective charges  $Z^*$ .
